# Supplementary material for: Association between pre-pregnancy multimorbidity and adverse maternal outcomes: A systematic review
Source: PubMed Central journal article supplement (PMC9106308; doi:10.1177/26335565221096584), 2022-04-30
Supplement: sj-pdf-1-cob-10.1177_26335565221096584.pdf [file sj-pdf-1-cob-10.1177_26335565221096584.pdf]

**Table S1. Example of Medline search strategy**

| <b>Concept</b>               | <b>Keywords</b>                                                                                                                                                                                                                                                    | <b>MeSH terms</b>                                                                                    |
|------------------------------|--------------------------------------------------------------------------------------------------------------------------------------------------------------------------------------------------------------------------------------------------------------------|------------------------------------------------------------------------------------------------------|
| Multimorbidity <sup>17</sup> | Co-morbidity.tw,kf<br>Multimorbidity.tw,kf<br>Multi-morbidity.tw,kf<br>(Multiple adj2 (disease* or disorder* or condition*)).tw,kf<br>Comorbidity.tw,kf                                                                                                            | Comorbidity/<br>Multiple chronic conditions/<br>Multimorbidity/                                      |
| Maternal morbidity           | ((Maternal or perinatal or peripartum or prenatal or antenatal or pregnancy or postpartum or postnatal) adj2 complication*).tw,kf<br>((Maternal or perinatal or peripartum or prenatal or antenatal or pregnancy or postpartum or postnatal) adj2 morbidity).tw,kf | Maternal health/Pregnancy complications/<br>Pregnancy, high risk/<br>Pregnancy outcome/              |
| Maternal mortality           | ((Maternal or perinatal or peripartum or prenatal or antenatal or pregnancy or postpartum or postnatal) adj2 mortality).tw,kf                                                                                                                                      | Maternal death/<br>Maternal mortality/                                                               |
| Perinatal health care use    | ((Maternal or perinatal or peripartum or prenatal or antenatal or pregnancy or postpartum or postnatal) adj2 hospital*).tw,kf                                                                                                                                      | Critical care/<br>Health care costs/<br>Hospitalization/<br>Intensive care units/<br>Length of stay/ |

**Table S2. Study characteristics**

| <b>Study</b>               | <b>Study location, study period</b> | <b>Study design, data sources</b>                | <b>Sample size, response, follow-up rates</b>                                                                                                                     | <b>Inclusion criteria</b>                         | <b>Multimorbidity definition</b>                                                                                                                                                                                                                                                  | <b>Outcome definition(s)</b>                                                                                         | <b>Confounders controlled for</b>                                                                                                            |
|----------------------------|-------------------------------------|--------------------------------------------------|-------------------------------------------------------------------------------------------------------------------------------------------------------------------|---------------------------------------------------|-----------------------------------------------------------------------------------------------------------------------------------------------------------------------------------------------------------------------------------------------------------------------------------|----------------------------------------------------------------------------------------------------------------------|----------------------------------------------------------------------------------------------------------------------------------------------|
| Admon 2018 a <sup>22</sup> | United States, 2013-2014            | Cross-sectional study, National Inpatient Sample | N=12,567 with ≥ 2 conditions<br>N=127,350 with 1 condition<br>N=1,368,496 with no conditions<br><br>Response rate: NA<br>Follow-up rate: NA<br>Missing data: < 3% | All hospital deliveries                           | 2+ of chronic heart disease, chronic hypertension, chronic kidney disease, chronic liver disease, chronic respiratory disease, HIV, pre-existing diabetes, substance use disorders using ICD-9-CM codes from delivery hospitalizations                                            | Severe maternal morbidity (composite) or mortality, hospital transfer, length of stay, using hospital discharge data | Controlled for age, rural residence, insurance payer, median household income, hospital region, obstetric outcomes (in sensitivity analyses) |
| Admon 2018 b <sup>23</sup> | United States, 2012-2015            | Cross-sectional study, National Inpatient Sample | N=55,404 with ≥ 2 conditions<br>N=326,852 with 1 condition<br>N=2,141,636 with no conditions<br><br>Response rate: NA<br>Follow-up rate: NA<br>Missing data: < 6% | All hospital deliveries                           | 2+ of chronic heart disease, chronic hypertension, chronic kidney disease, chronic respiratory disease, HIV, depression, pre-existing diabetes, pulmonary hypertension, substance use disorders, systemic lupus erythematosus using ICD-9-CM codes from delivery hospitalizations | Severe maternal morbidity (composite), using hospital discharge data                                                 | Stratified by ethnicity; controlled for age, rural residence, primary insurance payer, median household income, and hospital region          |
| Bandoli 2017 <sup>24</sup> | United States and Canada, 2009-2016 | Prospective cohort study, MotherToBaby Study     | N=179 with 1 of the autoimmune diseases and depression<br>N=1,228 with autoimmune disease only<br>N=153 with                                                      | English or Spanish-speaking, singleton livebirths | Comorbid autoimmune disease (rheumatoid arthritis, Crohn's disease, or psoriasis) and depression, using self-report verified by medical record review                                                                                                                             | Preeclampsia, using self-report verified by medical record review                                                    | Controlled for age, socioeconomic status, race/ethnicity, medical comorbidities, smoking, BMI,                                               |

| Study                         | Study location, study period | Study design, data sources                       | Sample size, response, follow-up rates                                                                                                | Inclusion criteria                                                                                       | Multimorbidity definition                                                                                                                                                                                                                                                                                                                                                        | Outcome definition(s)                                                                                                                          | Confounders controlled for                                                                                                |
|-------------------------------|------------------------------|--------------------------------------------------|---------------------------------------------------------------------------------------------------------------------------------------|----------------------------------------------------------------------------------------------------------|----------------------------------------------------------------------------------------------------------------------------------------------------------------------------------------------------------------------------------------------------------------------------------------------------------------------------------------------------------------------------------|------------------------------------------------------------------------------------------------------------------------------------------------|---------------------------------------------------------------------------------------------------------------------------|
|                               |                              |                                                  | depression only<br>N=1,550 with no conditions                                                                                         |                                                                                                          |                                                                                                                                                                                                                                                                                                                                                                                  |                                                                                                                                                | gestational age at enrollment                                                                                             |
|                               |                              |                                                  | Response rate: NR<br>Follow-up rate: NR<br>Missing data: NR                                                                           |                                                                                                          |                                                                                                                                                                                                                                                                                                                                                                                  |                                                                                                                                                |                                                                                                                           |
| Brown 2020 <sup>25</sup>      | United States, 2016-2017     | Cross-sectional study, National Inpatient Sample | N=60,718 with ≥ 3 comorbidities<br>N=145,131 with 2 comorbidities<br>N=296,185 with 1 comorbidity<br>N=1,480,925 with 0 comorbidities | All hospital deliveries with no missing data                                                             | Number of chronic comorbidities, defined using the 29 Elixhauser comorbidity measures identified by the Healthcare Cost and Utilization Project, excluding coagulation deficiency, complicated hypertension, congestive heart failure, peripheral perivascular disease, and pulmonary circulation disorders (which were also included in outcome), using hospital discharge data | Severe maternal morbidity (composite, overall and excluding those with blood transfusion as the only indicator), using hospital discharge data | Controlled for age, race/ethnicity, primary expected payer, median household income, location of residence, delivery type |
| Czerwinski 2012 <sup>26</sup> | United States, 1996-2008     | Prospective cohort study, Omega Study            | N=112 with asthma and migraine<br>N=933 with 1 condition<br>N=2,686 with neither condition                                            | English-speaking, ≥ 18 years, prenatal care < 20 weeks, planning to deliver at term in eligible hospital | Comorbid asthma and migraine, using self-report verified by medical record review                                                                                                                                                                                                                                                                                                | Pregnancy-induced hypertension and preeclampsia, from medical records                                                                          | Controlled for age, parity, race/ethnicity, marital status, medical comorbidities, smoking, BMI, multifetal pregnancy     |

| Study                      | Study location, study period | Study design, data sources                                     | Sample size, response, follow-up rates                                                                                                                                           | Inclusion criteria                                 | Multimorbidity definition                                                                                                                                                                          | Outcome definition(s)                                                                                      | Confounders controlled for                                                                                  |
|----------------------------|------------------------------|----------------------------------------------------------------|----------------------------------------------------------------------------------------------------------------------------------------------------------------------------------|----------------------------------------------------|----------------------------------------------------------------------------------------------------------------------------------------------------------------------------------------------------|------------------------------------------------------------------------------------------------------------|-------------------------------------------------------------------------------------------------------------|
| Prophet 2018 <sup>27</sup> | United States, 2002-2014     | Retrospective cohort study, Nationwide Inpatient Sample        | N=222 with sickle cell disease and HIV<br>N=127,954 with 1 condition<br>N=57,198,505 with neither condition<br><br>Response rate: NA<br>Follow-up rate: NA<br>Missing data: < 1% | All hospital deliveries                            | Comorbid sickle cell disease and HIV, using ICD-9-CM codes from delivery hospitalizations                                                                                                          | Severe preeclampsia, mild preeclampsia, pregnancy complications (composite), using hospital discharge data | Controlled for age, income, insurance status, race/ethnicity, geographical location                         |
| Varner 2020 <sup>28</sup>  | Canada, 2002-2017            | Retrospective cohort study, Ontario health administrative data | N=43,952 with 7-32 ADGs<br>N=139,728 with 5-6 ADGs<br>N=471,959 with 3-4 ADGs<br>N=2,070,354 with ≤2 ADGs<br><br>Response rate: NA<br>Follow-up rate: NA<br>Missing data: <31%   | All recognized pregnancies among Ontario residents | Number of comorbidities before the clinical start of pregnancy, expressed as the total number of Aggregated Diagnosis Groups (ADGs) obtained with the Johns Hopkins Adjusted Clinical Group System | Any emergency department visit during pregnancy or up to 42 days postpartum, using hospital discharge data | Controlled for age, parity, income quintile, region of residence, immigrant status, antenatal care provider |

Abbreviations: ADG = aggregated diagnosis group; NA = not applicable; NR = not reported.
